# Supplementary material
Source: ML conference proceedings conference paper supplement (https://openaccess.thecvf.com/content/cvpr_2017/html/Jia_Improving_Training_of_2017_CVPR_paper.html)
Supplement: Supplementary file 1 [file Jia_Improving_Training_of_2017_CVPR_supplemental.pdf]

## Supplemental material - Improving training of deep neural networks via Singular Value Bounding

**Lemma 1** For a matrix  $\mathbf{W} \in \mathbb{R}^{M \times N}$  with singular values of all 1, and a diagonal matrix  $\mathbf{G} \in \mathbb{R}^{M \times M}$  with nonzero entries  $\{g_i\}_{i=1}^M$ , let  $g_{\max} = \max(|g_1|, \dots, |g_M|)$  and  $g_{\min} = \min(|g_1|, \dots, |g_M|)$ , the singular values of  $\widetilde{\mathbf{W}} = \mathbf{G}\mathbf{W}$  is bounded in  $[g_{\min}, g_{\max}]$ . When  $\mathbf{W}$  is fat, i.e.,  $M \leq N$ , and  $\text{rank}(\mathbf{W}) = M$ , singular values of  $\widetilde{\mathbf{W}}$  are exactly  $\{|g_i|\}_{i=1}^M$ .

*Proof.* We first consider the general case, and let  $P = \min(M, N)$ . Denote singular values of  $\mathbf{W}$  as  $\sigma_1 = \dots = \sigma_P = 1$ , and singular values of  $\widetilde{\mathbf{W}}$  as  $\tilde{\sigma}_1 \geq \dots \geq \tilde{\sigma}_P$ . Based on the properties of matrix extreme singular values, we have

$$\sigma_1 = \|\mathbf{W}\|_2 = \max_{\mathbf{x} \neq \mathbf{0}} \frac{\|\mathbf{W}\mathbf{x}\|_2}{\|\mathbf{x}\|_2} = \min_{\mathbf{x} \neq \mathbf{0}} \frac{\|\mathbf{W}\mathbf{x}\|_2}{\|\mathbf{x}\|_2} = \sigma_P = 1.$$

Let  $\mathbf{x}^* = \arg \max_{\mathbf{x} \neq \mathbf{0}} \frac{\|\widetilde{\mathbf{W}}\mathbf{x}\|_2}{\|\mathbf{x}\|_2}$ , we have

$$\tilde{\sigma}_1 = \frac{\|\widetilde{\mathbf{W}}\mathbf{x}^*\|_2}{\|\mathbf{x}^*\|_2} = \frac{\|\mathbf{G}\mathbf{W}\mathbf{x}^*\|_2}{\|\mathbf{x}^*\|_2} \leq \frac{\|\mathbf{G}\|_2 \|\mathbf{W}\mathbf{x}^*\|_2}{\|\mathbf{x}^*\|_2},$$

where we have used the fact that  $\|\mathbf{A}\mathbf{b}\|_2 \leq \|\mathbf{A}\|_2 \|\mathbf{b}\|_2$  for any  $\mathbf{A} \in \mathbb{R}^{m \times n}$  and  $\mathbf{b} \in \mathbb{R}^n$ . We thus have

$$\tilde{\sigma}_1 \leq \|\mathbf{G}\|_2 \frac{\|\mathbf{W}\mathbf{x}^*\|_2}{\|\mathbf{x}^*\|_2} \leq \|\mathbf{G}\|_2 \max_{\mathbf{x} \neq \mathbf{0}} \frac{\|\mathbf{W}\mathbf{x}\|_2}{\|\mathbf{x}\|_2} = |g_{\max}|.$$

Since  $\mathbf{G}$  has nonzero entries, we have  $\mathbf{W} = \mathbf{G}^{-1}\widetilde{\mathbf{G}}$ . Let  $\mathbf{x}^* = \arg \min_{\mathbf{x} \neq \mathbf{0}} \frac{\|\widetilde{\mathbf{W}}\mathbf{x}\|_2}{\|\mathbf{x}\|_2}$ , the properties of matrix extreme singular values give  $\tilde{\sigma}_P = \frac{\|\widetilde{\mathbf{G}}\mathbf{x}^*\|_2}{\|\mathbf{x}^*\|_2}$ , and  $\sigma_P = \min_{\mathbf{x} \neq \mathbf{0}} \frac{\|\mathbf{W}\mathbf{x}\|_2}{\|\mathbf{x}\|_2} = 1$ . We thus have

$$1 = \min_{\mathbf{x} \neq \mathbf{0}} \frac{\|\mathbf{G}^{-1}\widetilde{\mathbf{G}}\mathbf{x}\|_2}{\|\mathbf{x}\|_2} \leq \frac{\|\mathbf{G}^{-1}\widetilde{\mathbf{G}}\mathbf{x}^*\|_2}{\|\mathbf{x}^*\|_2} \leq \|\mathbf{G}^{-1}\|_2 \frac{\|\widetilde{\mathbf{G}}\mathbf{x}^*\|_2}{\|\mathbf{x}^*\|_2},$$

which gives  $\tilde{\sigma}_P \geq |g_{\min}|$ . Overall, we have

$$|g_{\max}| \geq \tilde{\sigma}_1 \geq \dots \geq \tilde{\sigma}_P \geq |g_{\min}|.$$

We next consider the special case of  $M \leq N$  and  $\text{rank}(\mathbf{W}) = M$ . Without loss of generality, we assume diagonal entries  $\{g_i\}_{i=1}^M$  of  $\mathbf{G}$  are all positive and ordered. By definition we have  $\widetilde{\mathbf{W}} = \mathbf{I}\mathbf{G}\mathbf{W}$ , where  $\mathbf{I}$  is an identity matrix of size  $M \times M$ . Let  $\mathbf{V} = [\mathbf{W}^\top, \mathbf{W}^{\perp\top}]$ , where  $\mathbf{W}^\perp$  denotes the orthogonal complement of  $\mathbf{W}$ , we thus have the SVD of  $\widetilde{\mathbf{W}}$  by construction as  $\widetilde{\mathbf{W}} = \mathbf{I}[\mathbf{G}, \mathbf{0}]\mathbf{V}^\top$ . When some values of  $\{g_i\}_{i=1}^M$  are not positive, the SVD can be constructed by changing the signs of the corresponding columns of either  $\mathbf{I}$  or  $\mathbf{V}$ . Since matrix singular values are uniquely determined (while singular vectors are not), singular values of  $\widetilde{\mathbf{W}}$  are thus exactly  $\{|g_i|\}_{i=1}^M$ .  $\square$
